# Supplementary material for: Phytic Acid Content of Faba Beans (Vicia faba)—Annual and Varietal Effects, and Influence of Organic Cultivation Practices
Source: MDPI journal article supplement (doi:10.3390/agronomy12040889), 2022-04-06
Supplement: s1 [file s1]

## Supplementary Material

"Phytic Acid Content of Faba Beans (*Vicia faba*)—Annual and Varietal Effects, and Influence of Organic Cultivation Practices"

**Table S1: Bean sample set including meta data and results of phytic acid (PA) and dry mass analysis.**

| Sample No. | Year | ZIP code of location | cultivar | Summer/<br>Winter cultivar | farming system | fungicide used | insecticide used | Dry mass (dm) [%] | PA [g/100g] | PA [g/100g] 86% dm |
|------------|------|----------------------|----------|----------------------------|----------------|----------------|------------------|-------------------|-------------|--------------------|
| 1          | 2016 | D-04442              | Fanfare  | Summer                     | conv           | yes            | no               | 90.2              | 1.05        | 1.00               |
| 2          | 2016 | D-04442              | Taifun   | Summer                     | conv           | yes            | no               | 90.3              | 1.01        | 0.96               |
| 3          | 2016 | D-06237              | Tangenta | Summer                     | conv           | yes            | yes              | 90.8              | 1.15        | 1.09               |
| 4          | 2016 | D-06333              | Fanfare  | Summer                     | org            | no             | no               | 90.3              | 0.89        | 0.85               |
| 5          | 2016 | D-06526              | Fuego    | Summer                     | org            | no             | no               | 90.5              | 1.11        | 1.05               |
| 6          | 2016 | D-39606              | Bioro    | Summer                     | org            | no             | no               | 90.4              | 0.88        | 0.84               |
| 7          | 2016 | D-06526              | Fanfare  | Summer                     | conv           | yes            | yes              | 90.5              | 0.80        | 0.76               |
| 8          | 2016 | D-06526              | Fanfare  | Summer                     | conv           | yes            | yes              | 90.5              | 0.91        | 0.86               |
| 9          | 2016 | D-23923              | Fanfare  | Summer                     | conv           | yes            | no               | 89.9              | 1.05        | 1.00               |
| 10         | 2016 | D-17309              | Fuego    | Summer                     | org            | no             | no               | 89.5              | 1.05        | 1.01               |
| 11         | 2016 | D-27248              | Fuego    | Summer                     | org            | no             | no               | 89.4              | 0.87        | 0.83               |
| 12         | 2016 | D-30974              | Tiffany  | Summer                     | org            | no             | no               | 89.3              | 0.93        | 0.90               |
| 13         | 2016 | D-38550              | Hiverna  | Winter                     | org            | no             | no               | 88.9              | 0.82        | 0.80               |
| 14         | 2016 | D-31061              | Tiffany  | Summer                     | conv           | no             | no               | 87.3              | 1.04        | 1.02               |
| 15         | 2016 | D-31061              | Taifun   | Summer                     | conv           | no             | no               | 88.2              | 1.18        | 1.15               |
| 16         | 2016 | D-31061              | Fanfare  | Summer                     | conv           | no             | no               | 89.0              | 1.09        | 1.05               |
| 17         | 2016 | D-31061              | Fuego    | Summer                     | conv           | no             | no               | 89.3              | 1.06        | 1.02               |
| 18         | 2016 | D-31167              | Fanfare  | Summer                     | conv           | yes            | yes              | 88.3              | 1.10        | 1.07               |
| 19         | 2016 | D-49565              | Fuego    | Summer                     | conv           | no             | no               | 88.4              | 1.10        | 1.07               |

| <b>Sample No.</b> | <b>Year</b> | <b>ZIP code of location</b> | <b>cultivar</b> | <b>Summer/<br/>Winter cultivar</b> | <b>farming system</b> | <b>fungicide used</b> | <b>insecticide used</b> | <b>Dry mass (dm)</b> | <b>PA [g/100g]</b> | <b>PA [g/100g] 86% dm</b> |
|-------------------|-------------|-----------------------------|-----------------|------------------------------------|-----------------------|-----------------------|-------------------------|----------------------|--------------------|---------------------------|
| 20                | 2016        | D-37115                     | Taifun          | Summer                             | conv                  | no                    | no                      | 90.1                 | 0.93               | 0.88                      |
| 21                | 2016        | D-64397                     | Fanfare         | Summer                             | conv                  | yes                   | yes                     | 89.2                 | 1.21               | 1.17                      |
| 22                | 2016        | D-64397                     | Fanfare         | Summer                             | conv                  | yes                   | yes                     | 89.2                 | 1.15               | 1.11                      |
| 23                | 2016        | D-64397                     | Fanfare         | Summer                             | conv                  | yes                   | yes                     | 89.4                 | 1.22               | 1.17                      |
| 24                | 2016        | D-64397                     | Fanfare         | Summer                             | conv                  | yes                   | yes                     | 89.6                 | 1.11               | 1.06                      |
| 25                | 2016        | D-34311                     | Fuego           | Summer                             | conv                  | yes                   | yes                     | 89.7                 | 1.09               | 1.04                      |
| 26                | 2016        | D-34632                     | Fuego           | Summer                             | conv                  | yes                   | no                      | 89.8                 | 1.01               | 0.97                      |
| 27                | 2016        | D-34632                     | Fuego           | Summer                             | conv                  | yes                   | no                      | 89.9                 | 0.93               | 0.89                      |
| 28                | 2016        | D-34369                     | Boxer           | Summer                             | conv                  | yes                   | yes                     | 89.7                 | 0.86               | 0.83                      |
| 29                | 2016        | D-34369                     | Fuego           | Summer                             | conv                  | yes                   | yes                     | 89.7                 | 1.07               | 1.03                      |
| 30                | 2016        | D-34289                     | Fuego           | Summer                             | conv                  | yes                   | yes                     | 90.1                 | 1.06               | 1.01                      |
| 31                | 2016        | D-34289                     | Fuego           | Summer                             | conv                  | yes                   | yes                     | 89.9                 | 1.01               | 0.97                      |
| 32                | 2016        | D-34289                     | Bilbo           | Summer                             | org                   | no                    | no                      | 89.9                 | 1.00               | 0.96                      |
| 33                | 2016        | D-34593                     | Bilbo           | Summer                             | org                   | no                    | no                      | 89.8                 | 1.31               | 1.25                      |
| 34                | 2016        | D-59514                     | Fuego           | Summer                             | conv                  | no                    | no                      | 90.6                 | 0.98               | 0.93                      |
| 35                | 2016        | D-59469                     | Fuego           | Summer                             | conv                  | no                    | yes                     | 89.8                 | 1.20               | 1.15                      |
| 36                | 2016        | D-31020                     | Fuego           | Summer                             | conv                  | no                    | yes                     | 89.8                 | 0.96               | 0.92                      |
| 37                | 2016        | D-59174                     | Taifun          | Summer                             | conv                  | unknown               | unknown                 | 90.6                 | 1.10               | 1.05                      |
| 38                | 2016        | D-59457                     | Fuego           | Summer                             | conv                  | unknown               | unknown                 | 90.4                 | 1.37               | 1.30                      |
| 39                | 2016        | D-25718                     | Fuego           | Summer                             | conv                  | yes                   | no                      | 91.0                 | 1.03               | 0.98                      |
| 40                | 2016        | D-25718                     | Fuego           | Summer                             | conv                  | yes                   | no                      | 90.6                 | 1.14               | 1.08                      |
| 41                | 2016        | D-27478                     | Fuego           | Summer                             | conv                  | yes                   | yes                     | 90.8                 | 1.01               | 0.96                      |
| 42                | 2016        | D-21730                     | Fuego           | Summer                             | conv                  | yes                   | yes                     | 90.9                 | 0.95               | 0.90                      |

| Sample No. | Year | ZIP code of location | cultivar | Summer/<br>Winter cultivar | farming system | fungicide used | insecticide used | Dry mass (dm) | PA [g/100g] | PA [g/100g] 86% dm |
|------------|------|----------------------|----------|----------------------------|----------------|----------------|------------------|---------------|-------------|--------------------|
| 43         | 2016 | D-27283              | Fuego    | Summer                     | conv           | yes            | no               | 90.0          | 0.82        | 0.79               |
| 44         | 2016 | D-72531              | Bioro    | Summer                     | org            | no             | no               | 91.2          | 1.53        | 1.44               |
| 45         | 2016 | D-85128              | Fuego    | Summer                     | org            | no             | no               | 90.1          | 1.32        | 1.26               |
| 46         | 2016 | D-85302              | Fuego    | Summer                     | conv           | no             | no               | 90.1          | 1.50        | 1.43               |
| 47         | 2016 | D-86916              | Tiffany  | Summer                     | org            | no             | no               | 89.6          | 1.20        | 1.15               |
| 48         | 2016 | D-86916              | Taifun   | Summer                     | org            | no             | no               | 89.3          | 1.08        | 1.04               |
| 49         | 2016 | D-86916              | Divine   | Summer                     | org            | no             | no               | 89.5          | 1.22        | 1.17               |
| 50         | 2016 | D-86916              | Bioro    | Summer                     | org            | no             | no               | 89.4          | 1.30        | 1.25               |
| 51         | 2016 | D-86916              | Julia    | Summer                     | org            | no             | no               | 89.5          | 1.22        | 1.18               |
| 52         | 2016 | D-86916              | Julia    | Summer                     | org            | no             | no               | 89.5          | 1.38        | 1.33               |
| 53         | 2016 | D-83527              | Tiffany  | Summer                     | org            | no             | no               | 90.0          | 1.61        | 1.54               |
| 54         | 2016 | D-83527              | Taifun   | Summer                     | org            | no             | no               | 90.3          | 1.37        | 1.30               |
| 55         | 2016 | D-83527              | Divine   | Summer                     | org            | no             | no               | 89.7          | 1.61        | 1.54               |
| 56         | 2016 | D-83527              | Bioro    | Summer                     | org            | no             | no               | 90.0          | 1.60        | 1.53               |
| 57         | 2016 | D-83527              | Julia    | Summer                     | org            | no             | no               | 90.0          | 1.68        | 1.61               |
| 58         | 2017 | D-04442              | Fanfare  | Summer                     | conv           | yes            | no               | 91.0          | 1.43        | 1.35               |
| 59         | 2017 | D-04442              | Tiffany  | Summer                     | conv           | yes            | no               | 90.9          | 1.51        | 1.42               |
| 60         | 2017 | D-02627              | Taifun   | Summer                     | conv           | no             | yes              | 91.3          | 1.36        | 1.28               |
| 61         | 2017 | D-02627              | Taifun   | Summer                     | conv           | no             | yes              | 91.0          | 1.26        | 1.19               |
| 62         | 2017 | D-02627              | Tiffany  | Summer                     | conv           | no             | yes              | 90.7          | 1.32        | 1.25               |
| 63         | 2017 | D-02627              | Birgit   | Summer                     | conv           | no             | yes              | 90.7          | 1.24        | 1.17               |
| 64         | 2017 | D-08396              | Espresso | Summer                     | conv           | no             | no               | 91.0          | 1.08        | 1.02               |
| 65         | 2017 | D-08396              | Espresso | Summer                     | conv           | no             | no               | 90.9          | 1.07        | 1.02               |

| Sample No. | Year | ZIP code of location | cultivar | Summer/<br>Winter cultivar | farming system | fungicide used | insecticide used | Dry mass (dm) | PA [g/100g] | PA [g/100g] 86% dm |
|------------|------|----------------------|----------|----------------------------|----------------|----------------|------------------|---------------|-------------|--------------------|
| 66         | 2017 | D-08396              | Tiffany  | Summer                     | conv           | no             | no               | 90.9          | 1.03        | 0.97               |
| 67         | 2017 | D-08396              | Birgit   | Summer                     | conv           | no             | no               | 90.8          | 1.43        | 1.36               |
| 68         | 2017 | D-08396              | Fanfare  | Summer                     | conv           | no             | no               | 90.7          | 1.13        | 1.07               |
| 69         | 2017 | D-01156              | Gloria   | Summer                     | org            | no             | no               | 87.7          | 1.37        | 1.35               |
| 70         | 2017 | D-06333              | Fuego    | Summer                     | org            | no             | no               | 87.2          | 1.12        | 1.11               |
| 71         | 2017 | D-06526              | Fanfare  | Summer                     | conv           | yes            | yes              | 87.0          | 0.96        | 0.95               |
| 72         | 2017 | D-06526              | Fanfare  | Summer                     | conv           | no             | yes              | 86.8          | 1.14        | 1.13               |
| 73         | 2017 | D-06526              | Fanfare  | Summer                     | conv           | yes            | no               | 87.4          | 1.07        | 1.06               |
| 74         | 2017 | D-06526              | Fanfare  | Summer                     | conv           | yes            | no               | 87.7          | 1.13        | 1.11               |
| 75         | 2017 | D-06526              | Fanfare  | Summer                     | conv           | no             | no               | 87.8          | 1.19        | 1.17               |
| 76         | 2017 | D-06526              | Fanfare  | Summer                     | conv           | yes            | yes              | 87.9          | 1.12        | 1.10               |
| 77         | 2017 | D-06526              | Fanfare  | Summer                     | conv           | no             | no               | 87.7          | 0.98        | 0.96               |
| 78         | 2017 | D-06526              | Tiffany  | Summer                     | conv           | yes            | yes              | 87.6          | 1.07        | 1.05               |
| 79         | 2017 | D-06526              | Taifun   | Summer                     | conv           | yes            | yes              | 88.1          | 1.16        | 1.14               |
| 80         | 2017 | D-06578              | Scirocco | Summer                     | org            | no             | no               | 89.1          | 0.68        | 0.66               |
| 81         | 2017 | D-23923              | Fanfare  | Summer                     | conv           | yes            | no               | 87.6          | 0.82        | 0.81               |
| 82         | 2017 | D-36041              | Fuego    | Summer                     | org            | no             | no               | 89.9          | 1.08        | 1.04               |
| 83         | 2017 | D-64397              | Fanfare  | Summer                     | conv           | yes            | yes              | 88.7          | 1.19        | 1.15               |
| 84         | 2017 | D-64397              | Fanfare  | Summer                     | conv           | yes            | yes              | 88.7          | 0.93        | 0.90               |
| 85         | 2017 | D-64397              | Fanfare  | Summer                     | conv           | yes            | yes              | 88.9          | 1.00        | 0.97               |
| 86         | 2017 | D-64397              | Fanfare  | Summer                     | conv           | yes            | yes              | 88.5          | 0.97        | 0.95               |
| 87         | 2017 | D-34311              | Fuego    | Summer                     | conv           | yes            | yes              | 89.2          | 0.88        | 0.85               |
| 88         | 2017 | D-34632              | Fuego    | Summer                     | conv           | yes            | yes              | 89.5          | 1.12        | 1.08               |

| <b>Sample No.</b> | <b>Year</b> | <b>ZIP code of location</b> | <b>cultivar</b> | <b>Summer/<br/>Winter cultivar</b> | <b>farming system</b> | <b>fungicide used</b> | <b>insecticide used</b> | <b>Dry mass (dm)</b> | <b>PA [g/100g]</b> | <b>PA [g/100g] 86% dm</b> |
|-------------------|-------------|-----------------------------|-----------------|------------------------------------|-----------------------|-----------------------|-------------------------|----------------------|--------------------|---------------------------|
| 89                | 2017        | D-34289                     | Fuego           | Summer                             | conv                  | yes                   | yes                     | 89.6                 | 1.11               | 1.06                      |
| 90                | 2017        | D-34289                     | Fuego           | Summer                             | conv                  | yes                   | yes                     | 89.5                 | 1.34               | 1.29                      |
| 91                | 2017        | D-34289                     | Fanfare         | Summer                             | conv                  | yes                   | yes                     | 89.8                 | 1.13               | 1.08                      |
| 92                | 2017        | D-34289                     | Bilbo           | Summer                             | org                   | no                    | no                      | 89.4                 | 1.21               | 1.16                      |
| 93                | 2017        | D-34289                     | Bilbo           | Summer                             | org                   | no                    | no                      | 89.6                 | 1.22               | 1.17                      |
| 94                | 2017        | D-34289                     | Bilbo           | Summer                             | org                   | no                    | no                      | 89.5                 | 1.06               | 1.02                      |
| 95                | 2017        | D-34593                     | Bilbo           | Summer                             | org                   | no                    | no                      | 89.8                 | 1.45               | 1.38                      |
| 96                | 2017        | D-59469                     | Fuego           | Summer                             | conv                  | unknown               | unknown                 | 89.7                 | 0.92               | 0.88                      |
| 97                | 2017        | D-59469                     | Tiffany         | Summer                             | conv                  | unknown               | unknown                 | 89.7                 | 0.74               | 0.71                      |
| 98                | 2017        | D-59174                     | Taifun          | Summer                             | conv                  | yes                   | yes                     | 88.9                 | 0.74               | 0.72                      |
| 99                | 2017        | D-25718                     | Fanfare         | Summer                             | conv                  | yes                   | no                      | 83.9                 | 1.11               | 1.14                      |
| 100               | 2017        | D-25718                     | Fuego           | Summer                             | conv                  | yes                   | no                      | 83.9                 | 1.06               | 1.09                      |
| 101               | 2017        | D-21762                     | Tiffany         | Summer                             | conv                  | yes                   | yes                     | 88.3                 | 0.63               | 0.61                      |
| 102               | 2017        | D-21762                     | Taifun          | Summer                             | conv                  | yes                   | yes                     | 88.5                 | 0.75               | 0.72                      |
| 103               | 2017        | D-21762                     | Fanfare         | Summer                             | conv                  | yes                   | yes                     | 88.6                 | 0.85               | 0.82                      |
| 104               | 2017        | D-21762                     | Isabell         | Summer                             | conv                  | yes                   | yes                     | 88.4                 | 1.00               | 0.97                      |
| 105               | 2017        | D-21763                     | Boxer           | Summer                             | conv                  | yes                   | yes                     | 88.7                 | 0.66               | 0.64                      |
| 106               | 2017        | D-21762                     | Fuego           | Summer                             | conv                  | yes                   | yes                     | 88.5                 | 0.79               | 0.77                      |
| 107               | 2017        | D-21762                     | Fuego           | Summer                             | conv                  | yes                   | yes                     | 88.5                 | 0.90               | 0.87                      |
| 108               | 2017        | D-21762                     | Fuego           | Summer                             | conv                  | yes                   | yes                     | 88.5                 | 0.71               | 0.69                      |
| 109               | 2017        | D-21764                     | Fuego           | Summer                             | conv                  | yes                   | yes                     | 88.4                 | 0.75               | 0.73                      |
| 110               | 2017        | D-21762                     | Birgit          | Summer                             | conv                  | yes                   | yes                     | 88.3                 | 0.92               | 0.90                      |
| 111               | 2017        | D-21762                     | Birgit          | Summer                             | conv                  | yes                   | yes                     | 88.6                 | 0.73               | 0.71                      |

| <b>Sample No.</b> | <b>Year</b> | <b>ZIP code of location</b> | <b>cultivar</b> | <b>Summer/<br/>Winter cultivar</b> | <b>farming system</b> | <b>fungicide used</b> | <b>insecticide used</b> | <b>Dry mass (dm)</b> | <b>PA [g/100g]</b> | <b>PA [g/100g] 86% dm</b> |
|-------------------|-------------|-----------------------------|-----------------|------------------------------------|-----------------------|-----------------------|-------------------------|----------------------|--------------------|---------------------------|
| 112               | 2017        | D-21762                     | Birgit          | Summer                             | conv                  | yes                   | yes                     | 88.3                 | 0.76               | 0.74                      |
| 113               | 2017        | D-21765                     | Birgit          | Summer                             | conv                  | yes                   | yes                     | 88.2                 | 0.93               | 0.91                      |
| 114               | 2017        | D-21762                     | Birgit          | Summer                             | conv                  | yes                   | yes                     | 88.3                 | 0.80               | 0.78                      |
| 115               | 2017        | D-21762                     | Birgit          | Summer                             | conv                  | yes                   | yes                     | 88.2                 | 0.87               | 0.85                      |
| 116               | 2017        | D-21730                     | Fuego           | Summer                             | conv                  | yes                   | yes                     | 83.7                 | 0.66               | 0.68                      |
| 117               | 2017        | D-27283                     | Fuego           | Summer                             | conv                  | yes                   | no                      | 87.3                 | 0.86               | 0.84                      |
| 118               | 2017        | D-27283                     | Fuego           | Summer                             | conv                  | yes                   | no                      | 87.3                 | 0.88               | 0.87                      |
| 119               | 2017        | D-85128                     | Fanfare         | Summer                             | org                   | no                    | no                      | 88.9                 | 1.13               | 1.10                      |
| 120               | 2017        | D-85302                     | Boxer           | Summer                             | conv                  | no                    | no                      | 90.2                 | 1.03               | 0.98                      |
| 121               | 2017        | D-97729                     | Detpop          | Summer                             | org                   | no                    | no                      | 82.6                 | 1.19               | 1.24                      |
| 122               | 2017        | D-86916                     | Tiffany         | Summer                             | org                   | no                    | no                      | 85.7                 | 1.07               | 1.08                      |
| 123               | 2017        | D-83527                     | Fanfare         | Summer                             | org                   | no                    | no                      | 88.2                 | 1.35               | 1.31                      |
| 124               | 2018        | D-06333                     | Fuego           | Summer                             | org                   | no                    | no                      | 88.9                 | 0.69               | 0.67                      |
| 125               | 2018        | D-06268                     | Fanfare         | Summer                             | conv                  | yes                   | no                      | 89.1                 | 1.06               | 1.03                      |
| 126               | 2018        | D-06268                     | Fanfare         | Summer                             | conv                  | yes                   | yes                     | 89.3                 | 1.06               | 1.02                      |
| 127               | 2018        | D-06268                     | Fanfare         | Summer                             | conv                  | yes                   | yes                     | 89.8                 | 0.57               | 0.55                      |
| 128               | 2018        | D-06268                     | Tiffany         | Summer                             | conv                  | yes                   | yes                     | 89.6                 | 0.95               | 0.91                      |
| 129               | 2018        | D-06268                     | Tiffany         | Summer                             | conv                  | no                    | yes                     | 89.5                 | 0.90               | 0.87                      |
| 130               | 2018        | D-06268                     | Tiffany         | Summer                             | conv                  | no                    | yes                     | 89.7                 | 0.77               | 0.74                      |
| 131               | 2018        | D-99955                     | Tiffany         | Summer                             | org                   | no                    | yes                     | 89.7                 | 1.13               | 1.09                      |
| 132               | 2018        | D-99955                     | Espresso        | Summer                             | conv                  | yes                   | yes                     | 89.3                 | 0.82               | 0.79                      |
| 133               | 2018        | D-99955                     | Scirocco        | Summer                             | org                   | no                    | no                      | 90.6                 | 1.21               | 1.15                      |
| 134               | 2018        | D-23923                     | Fanfare         | Summer                             | conv                  | no                    | yes                     | 89.1                 | 0.65               | 0.63                      |

| <b>Sample No.</b> | <b>Year</b> | <b>ZIP code of location</b> | <b>cultivar</b> | <b>Summer/<br/>Winter cultivar</b> | <b>farming system</b> | <b>fungicide used</b> | <b>insecticide used</b> | <b>Dry mass (dm)</b> | <b>PA [g/100g]</b> | <b>PA [g/100g] 86% dm</b> |
|-------------------|-------------|-----------------------------|-----------------|------------------------------------|-----------------------|-----------------------|-------------------------|----------------------|--------------------|---------------------------|
| 135               | 2018        | D-36041                     | Fuego           | Summer                             | org                   | no                    | no                      | 89.7                 | 1.27               | 1.22                      |
| 136               | 2018        | D-64397                     | Fanfare         | Summer                             | conv                  | unknown               | yes                     | 90.2                 | 0.98               | 0.93                      |
| 137               | 2018        | D-64397                     | Fanfare         | Summer                             | conv                  | unknown               | yes                     | 90.3                 | 1.18               | 1.12                      |
| 138               | 2018        | D-64397                     | Fanfare         | Summer                             | conv                  | unknown               | yes                     | 90.0                 | 1.18               | 1.13                      |
| 139               | 2018        | D-64397                     | Fanfare         | Summer                             | conv                  | unknown               | yes                     | 89.9                 | 1.08               | 1.04                      |
| 140               | 2018        | D-64397                     | Fanfare         | Summer                             | conv                  | unknown               | yes                     | 89.6                 | 1.17               | 1.12                      |
| 141               | 2018        | D-34311                     | Tiffany         | Summer                             | conv                  | yes                   | yes                     | 91.2                 | 1.05               | 0.99                      |
| 142               | 2018        | D-34632                     | Fuego           | Summer                             | conv                  | no                    | yes                     | 89.9                 | 0.73               | 0.70                      |
| 143               | 2018        | D-34289                     | Tiffany         | Summer                             | conv                  | yes                   | yes                     | 89.9                 | 1.16               | 1.11                      |
| 144               | 2018        | D-34289                     | Bilbo           | Summer                             | org                   | no                    | no                      | 90.4                 | 1.27               | 1.20                      |
| 145               | 2018        | D-34593                     | Bilbo           | Summer                             | org                   | no                    | no                      | 90.2                 | 1.30               | 1.24                      |
| 146               | 2018        | D-59514                     | Fanfare         | Summer                             | org                   | no                    | no                      | 89.4                 | 1.05               | 1.01                      |
| 147               | 2018        | D-59469                     | Tiffany         | Summer                             | conv                  | unknown               | yes                     | 89.0                 | 1.25               | 1.21                      |
| 148               | 2018        | D-59174                     | Taifun          | Summer                             | conv                  | yes                   | yes                     | 89.3                 | 1.51               | 1.45                      |
| 149               | 2018        | D-25718                     | Fuego           | Summer                             | conv                  | yes                   | yes                     | 89.7                 | 0.99               | 0.95                      |
| 150               | 2018        | D-25718                     | Fuego           | Summer                             | conv                  | yes                   | yes                     | 89.9                 | 1.20               | 1.15                      |
| 151               | 2018        | D-27283                     | Tiffany         | Summer                             | conv                  | yes                   | yes                     | 89.5                 | 0.76               | 0.73                      |
| 152               | 2018        | D-27283                     | Tiffany         | Summer                             | conv                  | yes                   | yes                     | 89.9                 | 1.18               | 1.13                      |
| 153               | 2018        | D-26736                     | Fuego           | Summer                             | conv                  | no                    | no                      | 85.9                 | 1.09               | 1.09                      |
| 154               | 2018        | D-26737                     | Fuego           | Summer                             | conv                  | yes                   | yes                     | 86.2                 | 1.28               | 1.27                      |
| 155               | 2018        | D-34431                     | Fanfare         | Summer                             | conv                  | no                    | no                      | 91.0                 | 0.78               | 0.74                      |
| 156               | 2018        | D-72531                     | Bioro           | Summer                             | org                   | no                    | no                      | 91.0                 | 1.50               | 1.42                      |
| 157               | 2018        | D-88450                     | Tiffany         | Summer                             | org                   | no                    | no                      | 90.7                 | 1.43               | 1.36                      |

| <b>Sample No.</b> | <b>Year</b> | <b>ZIP code of location</b> | <b>cultivar</b> | <b>Summer/<br/>Winter cultivar</b> | <b>farming system</b> | <b>fungicide used</b> | <b>insecticide used</b> | <b>Dry mass (dm)</b> | <b>PA [g/100g]</b> | <b>PA [g/100g]<br/>86% dm</b> |
|-------------------|-------------|-----------------------------|-----------------|------------------------------------|-----------------------|-----------------------|-------------------------|----------------------|--------------------|-------------------------------|
| 158               | 2018        | D-88450                     | Tiffany         | Summer                             | org                   | no                    | no                      | 88.2                 | 1.58               | 1.54                          |
| 159               | 2018        | D-85128                     | Fanfare         | Summer                             | org                   | no                    | no                      | 89.6                 | 1.24               | 1.19                          |
| 160               | 2018        | D-94086                     | Fanfare         | Summer                             | conv                  | no                    | no                      | 90.0                 | 1.31               | 1.25                          |
| 161               | 2018        | D-86916                     | Tiffany         | Summer                             | org                   | no                    | no                      | 87.2                 | 1.26               | 1.25                          |
| 162               | 2018        | D-83527                     | Fuego           | Summer                             | org                   | no                    | no                      | 87.6                 | 0.86               | 0.84                          |
